# Supplementary material for: A green, robust, and versatile BN nanosheet unidirectional aerogel encapsulated phase change material for effective thermal management of electronics and solar-thermoelectric conversion
Source: Royal Society of Chemistry journal article supplement (doi:10.1039/d2ta08475a), 2023-01-01
Supplement: d2ta08475a1.pdf [file d2ta08475a1.pdf]

## Supplementary Information

### **Green, robust and versatile BN nanosheets unidirectional aerogel encapsulated phase change material for effective thermal management of electronics and solar-thermoelectric conversion**

Linda Lv,<sup>a</sup> Hong Ai,<sup>a</sup> Taorui Chen,<sup>c</sup> Wangting Zhu,<sup>b</sup> Yi Guo,<sup>a</sup> Lijie Dong<sup>a,\*</sup> and Shaokun  
Song<sup>a,\*</sup>

<sup>a</sup> Center for Smart Materials and Devices, State Key Laboratory of Advanced Technology for  
Materials Synthesis and Processing, and School of Materials Science and Engineering,  
Wuhan University of Technology, Wuhan 430070, PR China

<sup>b</sup> Center for Materials Research and Analysis, Wuhan University of Technology, Wuhan  
430070, PR China

<sup>c</sup> Department of Materials Science and Engineering, University of Michigan, Ann Arbor,  
Michigan, 48109, USA

\* Corresponding author

E-mail address: [songsk@whut.edu.cn](mailto:songsk@whut.edu.cn) (Shaokun Song)

E-mail address: [dong@whut.edu.cn](mailto:dong@whut.edu.cn) (Lijie Dong)

1 **Table S1.** Thermophysical properties of samples after different thermal cycles.

| Samples     | Heating process |                    | Cooling process |                    | LA ratio (%) |
|-------------|-----------------|--------------------|-----------------|--------------------|--------------|
|             | $T_m$ (°C)      | $\Delta H_m$ (J/g) | $T_c$ (°C)      | $\Delta H_c$ (J/g) |              |
| LA          | 43.18           | 194.1              | 39.87           | 197.1              | 100          |
| 0 cycles    | 41.71           | 190.4              | 40.99           | 189.2              | 98.1         |
| 100 cycles  | 41.02           | 185.1              | 40.15           | 184.3              | 95.4         |
| 500 cycles  | 42.41           | 188.5              | 41.06           | 188.9              | 97.1         |
| 1000 cycles | 42.79           | 188.2              | 41.54           | 187.4              | 96.9         |
| 2000 cycles | 43.17           | 187.1              | 41.46           | 186.8              | 96.4         |

2

3

4

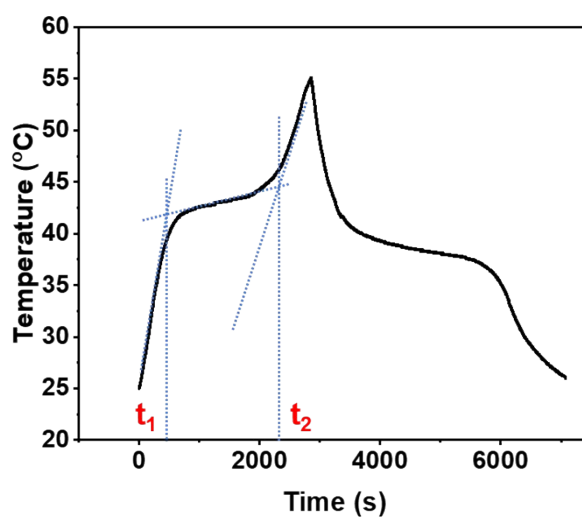

5

6 **Figure S1.** The method for determining the starting and terminating time points of samples.

7

8

9 **Table S2.** Solar-thermal energy conversion details of CPCM-10 at different intensities of  
 10 700, 1000 and 1700 W/m<sup>2</sup>.

| Samples                 | CPCM-10 | CPCM-10 | CPCM-10 |
|-------------------------|---------|---------|---------|
| $m$ (g)                 | 3.5205  | 3.5205  | 3.5205  |
| $S$ (cm <sup>2</sup> )  | 3.4636  | 3.4636  | 3.4636  |
| $\Delta H$ (J/g)        | 185.1   | 185.1   | 185.1   |
| $P$ (W/m <sup>2</sup> ) | 700     | 1000    | 1700    |
| $t_1$ (s)               | 967     | 611     | 495     |
| $t_2$ (s)               | 3194    | 2198    | 1740    |
| $t_2 - t_1$ (s)         | 2227    | 1587    | 1245    |
| $\eta$ (%)              | 49.69   | 69.74   | 88.89   |

11
